# Supplementary material for: Two-step separation of lignin from poplar wood powder using malic acid/choline chloride deep eutectic solvents
Source: Royal Society of Chemistry journal article supplement (doi:10.1039/d3nj02987e), 2023-01-01
Supplement: d3nj02987e1.pdf [file d3nj02987e1.pdf]

**Two-step separation of lignin from poplar wood powder by malic  
acid/choline chloride deep eutectic solvents**

*<sup>a</sup> Institute of New Energy and Low-carbon Technology, Sichuan University, Chengdu  
610207, China.*

*<sup>b</sup> School of Chemical Engineering, Sichuan University, Chengdu 610065, China*

\* Corresponding author at:

School of Chemical Engineering, Sichuan University, Chengdu 610065, China

. Tel.: +86-028-85999978; Fax: +86-028-62138325.

E-mail addresses: [luhouf@scu.edu.cn](mailto:luhouf@scu.edu.cn); [luhouf@163.com](mailto:luhouf@163.com) (Houfang Lu).

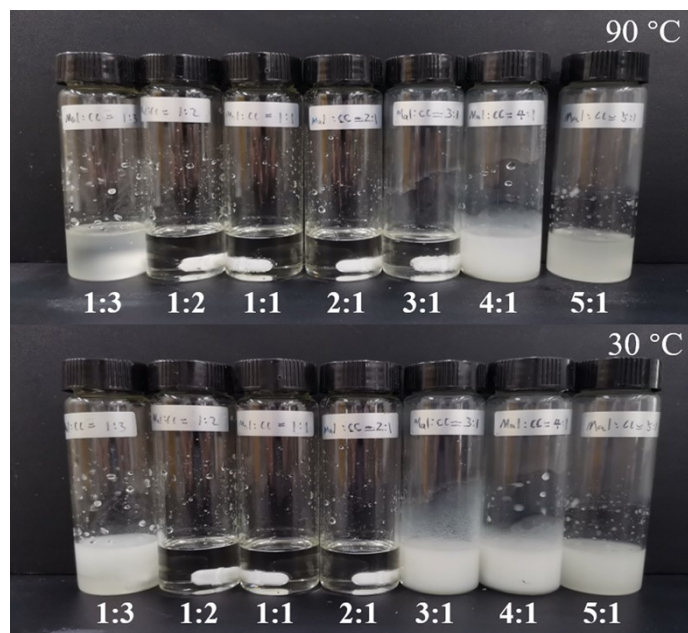

**Figure S1.** Photographs of different molar ratios of Mal/ChCl (anhydrous) at synthesis temperature (90 °C) and at room temperature (30 °C).

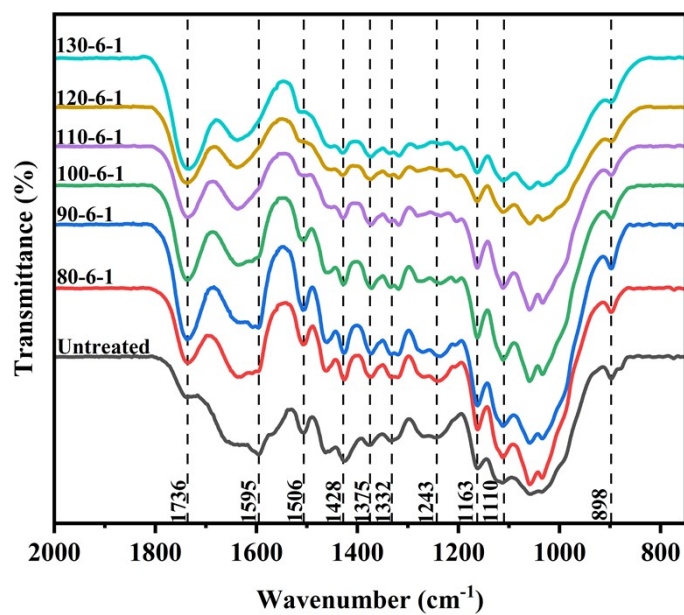

**Figure S2.** FT-IR spectra of SR samples after one-step DESs treatment under different temperature (Mal/ChCl, 6 h).

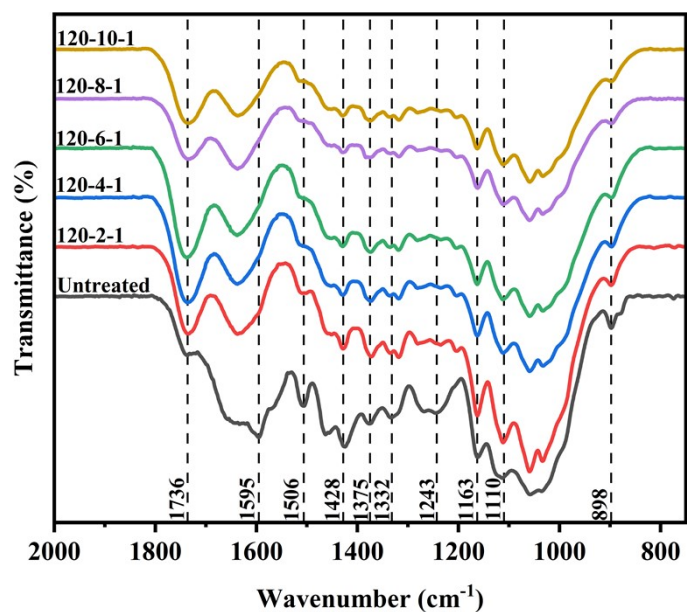

**Figure S3.** FT-IR spectra of SR samples after one-step DESs treatment under different time (Mal/ChCl, 120 °C).

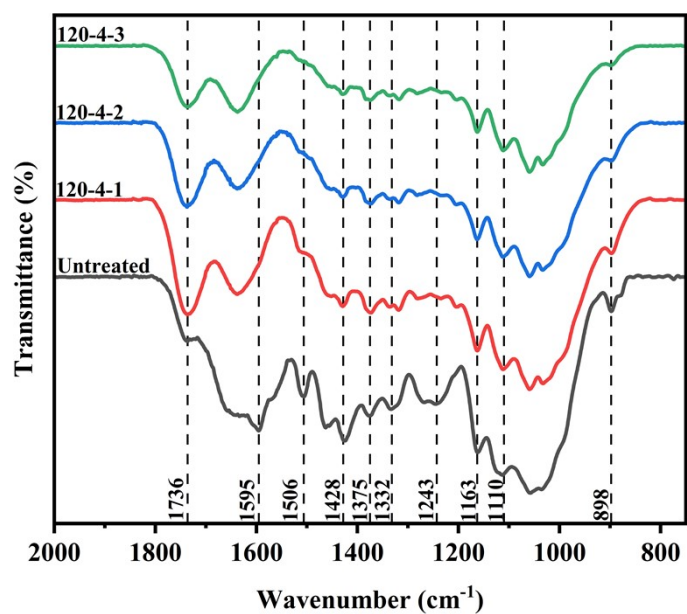

**Figure S4.** FT-IR spectra of SR samples after multiple DESs treatments (Mal/ChCl, 120 °C, 4 h).

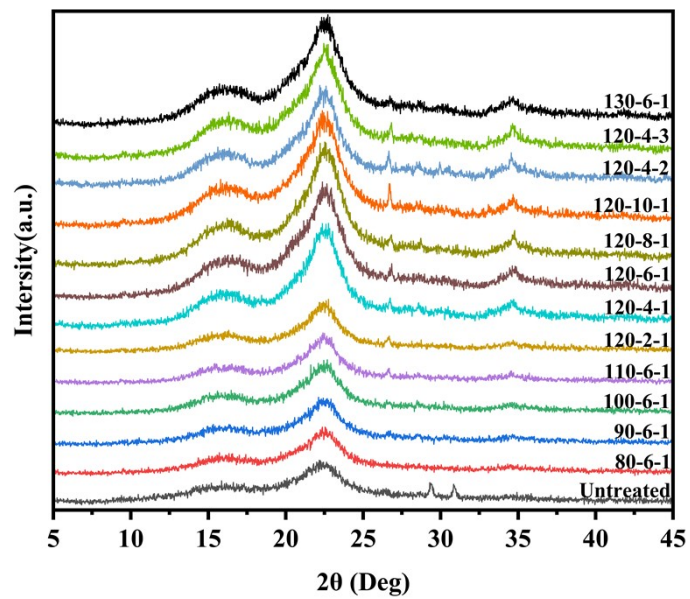

**Figure S5.** X-ray diffraction pattern of biomass samples before and after DES treatment.

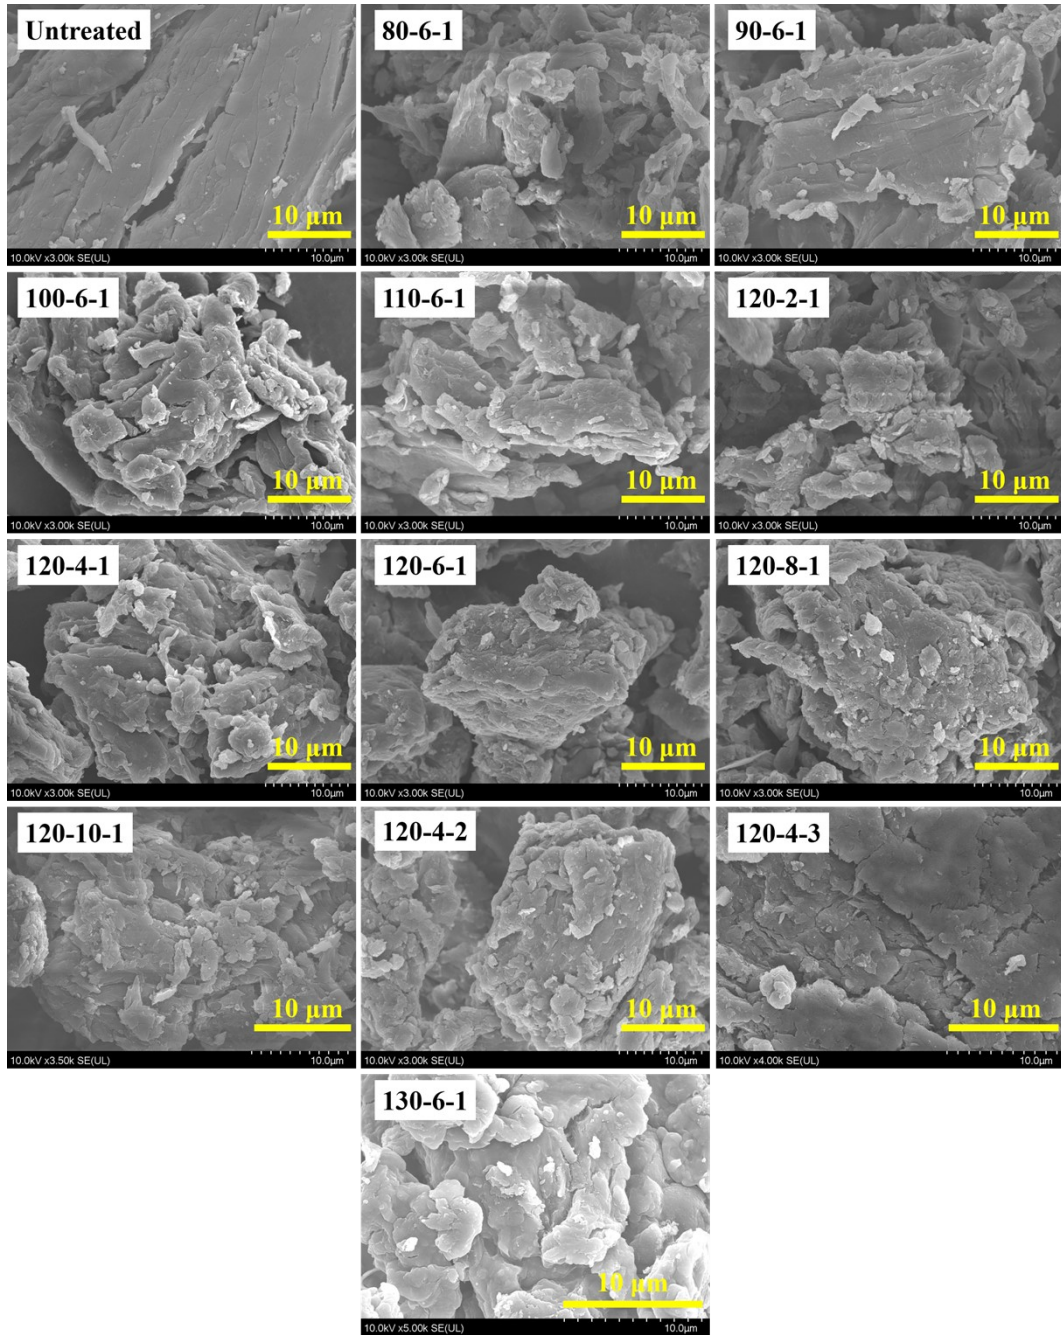

**Figure S6.** SEM images of biomass samples before and after DES treatment.

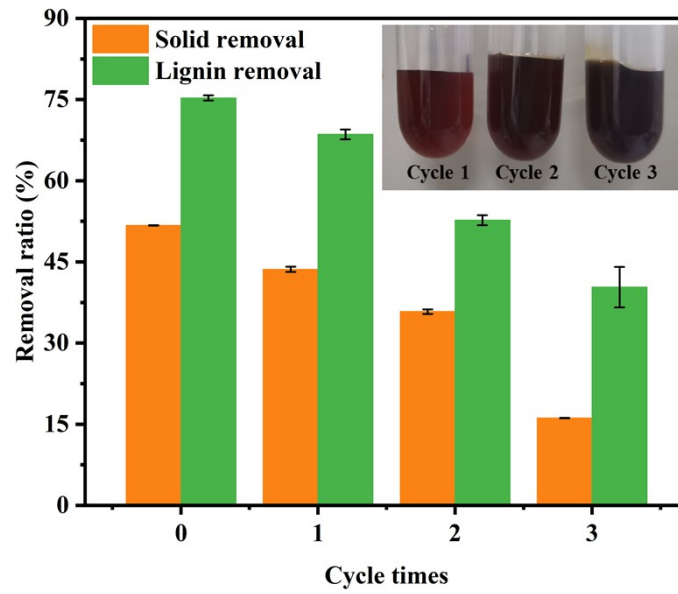

**Figure S7.** Photographs and removal ratio of solid and lignin under different treatment cycles.

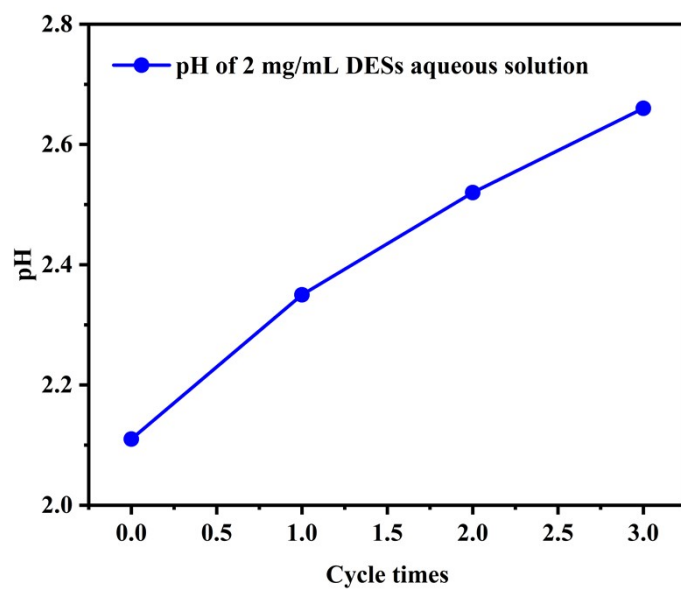

**Figure S8.** The pH values of 2 mg/mL aqueous solution under different treatment cycles.
